# Supplementary material for: Pulchinenoside B4 ameliorates oral ulcers in rats by modulating gut microbiota and metabolites
Source: PubMed Central journal article supplement (PMC11003895; doi:10.1007/s00253-024-13099-1), 2024-04-09
Supplement: 253_2024_13099_MOESM1_ESM.pdf [file 253_2024_13099_MOESM1_ESM.pdf]

## **Supplemental Material**

**Journal name:** *Applied Microbiology and Biotechnology*

**Manuscript Title:** Pulchrenoside B4 ameliorates oral ulcers in rats by modulating gut microbiota and metabolites

**The names of the authors:** Dewei Luo, Li Yan, Zhujun Wang, Xiaofan Ji, Na Pei, Jing Jia, Yingying Luo, Hui Ouyang, Shiling Yang, Yuling Feng

**The affiliations and addresses of the authors:**

1. Jiangxi University of Traditional Chinese Medicine, No.818 Yunwan Road, Nanchang 330002, PR China

2. State Key Laboratory of Innovative Drug and Efficient Energy-Saving Pharmaceutical Equipment, No. 56 Yangming Road, Nanchang 330006, PR China

3. Research Center of Natural Resources of Chinese Medicinal Materials and Ethnic Medicine, Jiangxi University of Traditional Chinese Medicine, No.818 Yunwan Road. Nanchang 330004, PR China

4. Xinyu University, No.2666 Yangguang Road, Xinyu 338004, PR China

**Corresponding authors:** huiouyang@163.com, fengyulin2003@126.com, luoying0302@163.com.

### **H&E staining protocol**

OU tissue sections were deparaffinized with xylene and washed with various levels of ethanol in the following steps: Sections were stained with hematoxylin solution for 3 to 5min, then differentiated with

differentiation solution, stained with back blue solution (0.4% ammonia), and finally rinsed with tap water. The rinsed sections were treated in absolute ethanol for 5 min(5 min each time, repeated 3 times) and xylene for 5 min(5 min each time, repeated 2 times) to make them transparent, and then the sections were dried and sealed with neutral glue and photographed under an electron microscope for histopathological changes.

**Figures:**

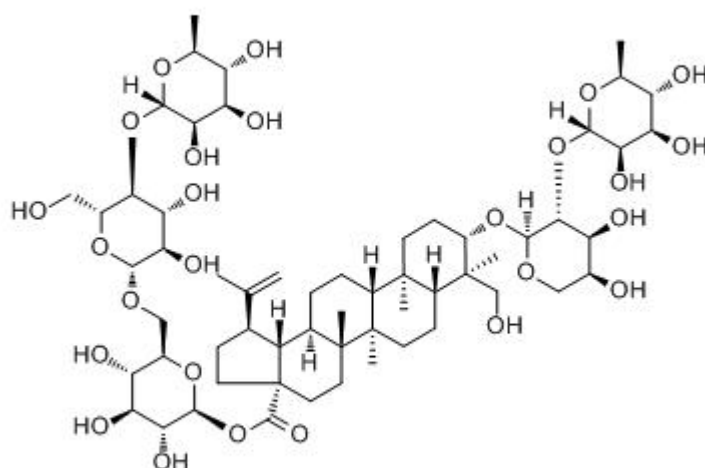

Fig. S1. *Pulsatilla* saponin B4 structure. Structure reference vital genesis network ([https://www.chemsrc.com/cas/129741-57-7\\_895739.html](https://www.chemsrc.com/cas/129741-57-7_895739.html))

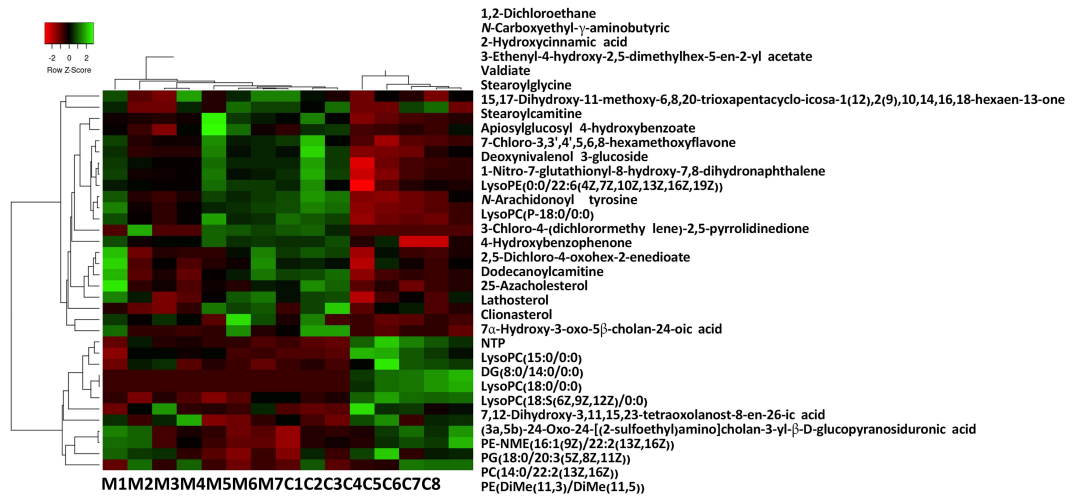

Fig. S2-1. Serum metabolomics study of rat oral ulcer model with clustering fever related to rats in normal and OU model groups.

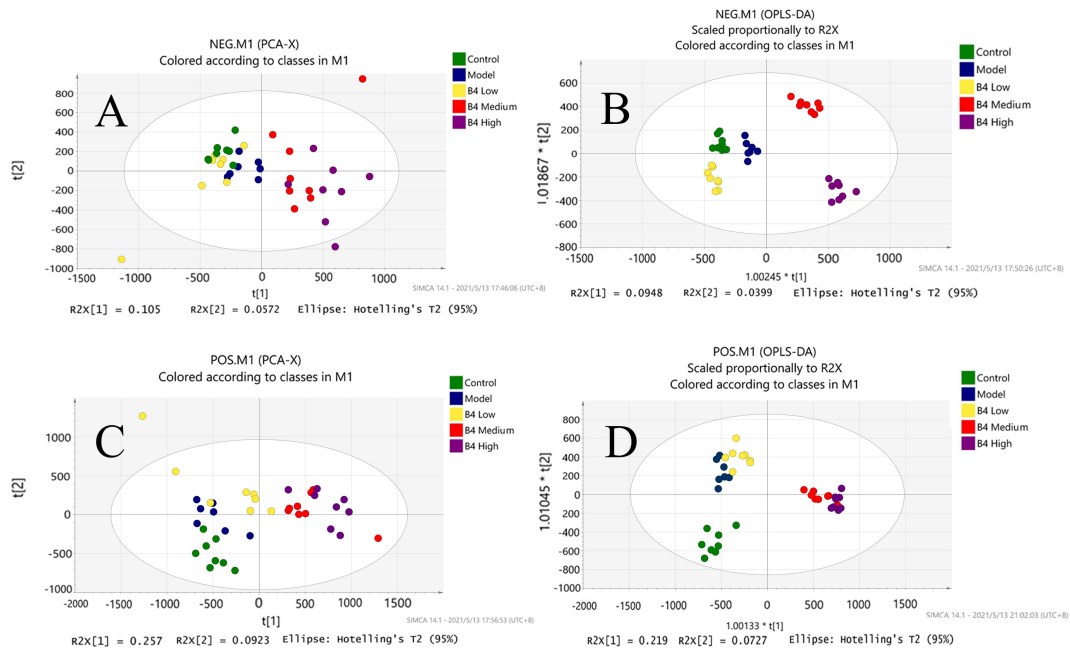

Fig. S2-2. Serum metabolomics study of rat oral ulcer model. A: PCA profile of each group of serum samples in negative ion mode. B: OPLS-DA profile of each group of serum samples in negative ion mode. C: PCA of each group of serum samples in positive ion mode contour map. D: OPLS-DA contour map of each group of serum samples in positive ion mode.

G

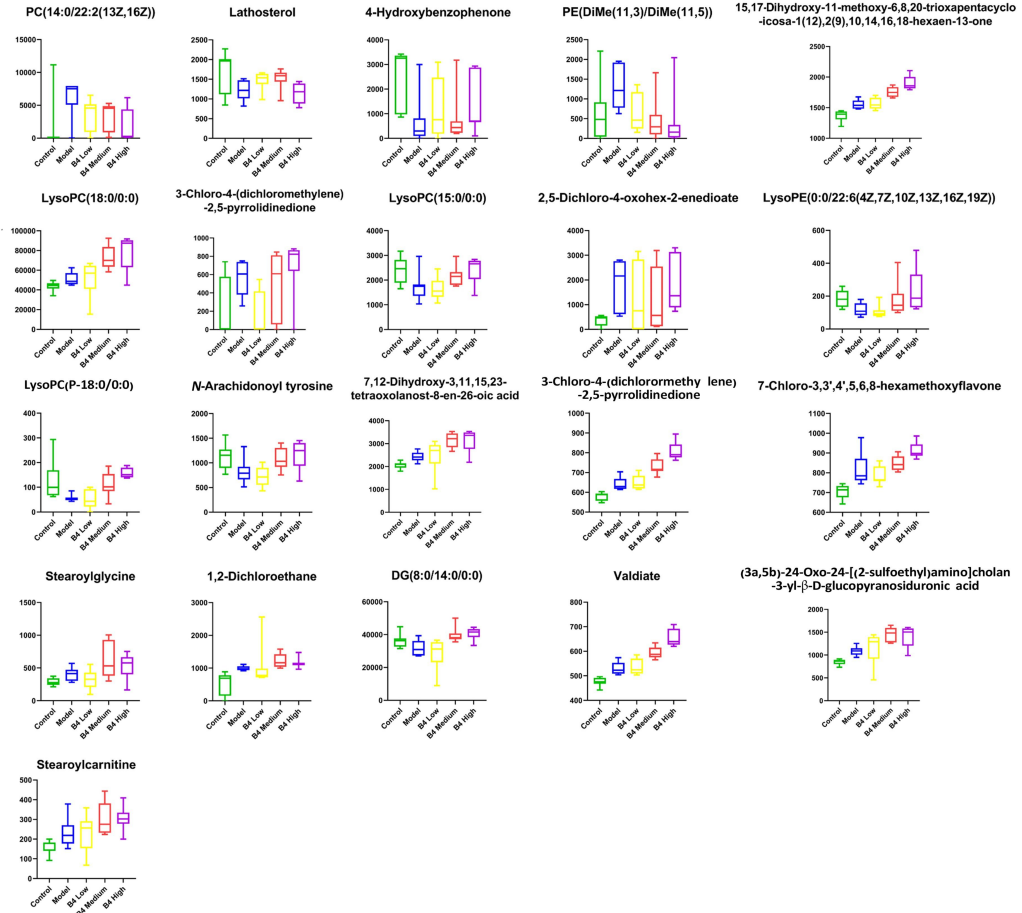

Fig. S2-3. Serum metabolomics study of rat oral ulcer model. G: Box graph to study the regulation of each group of biomarkers after administration.

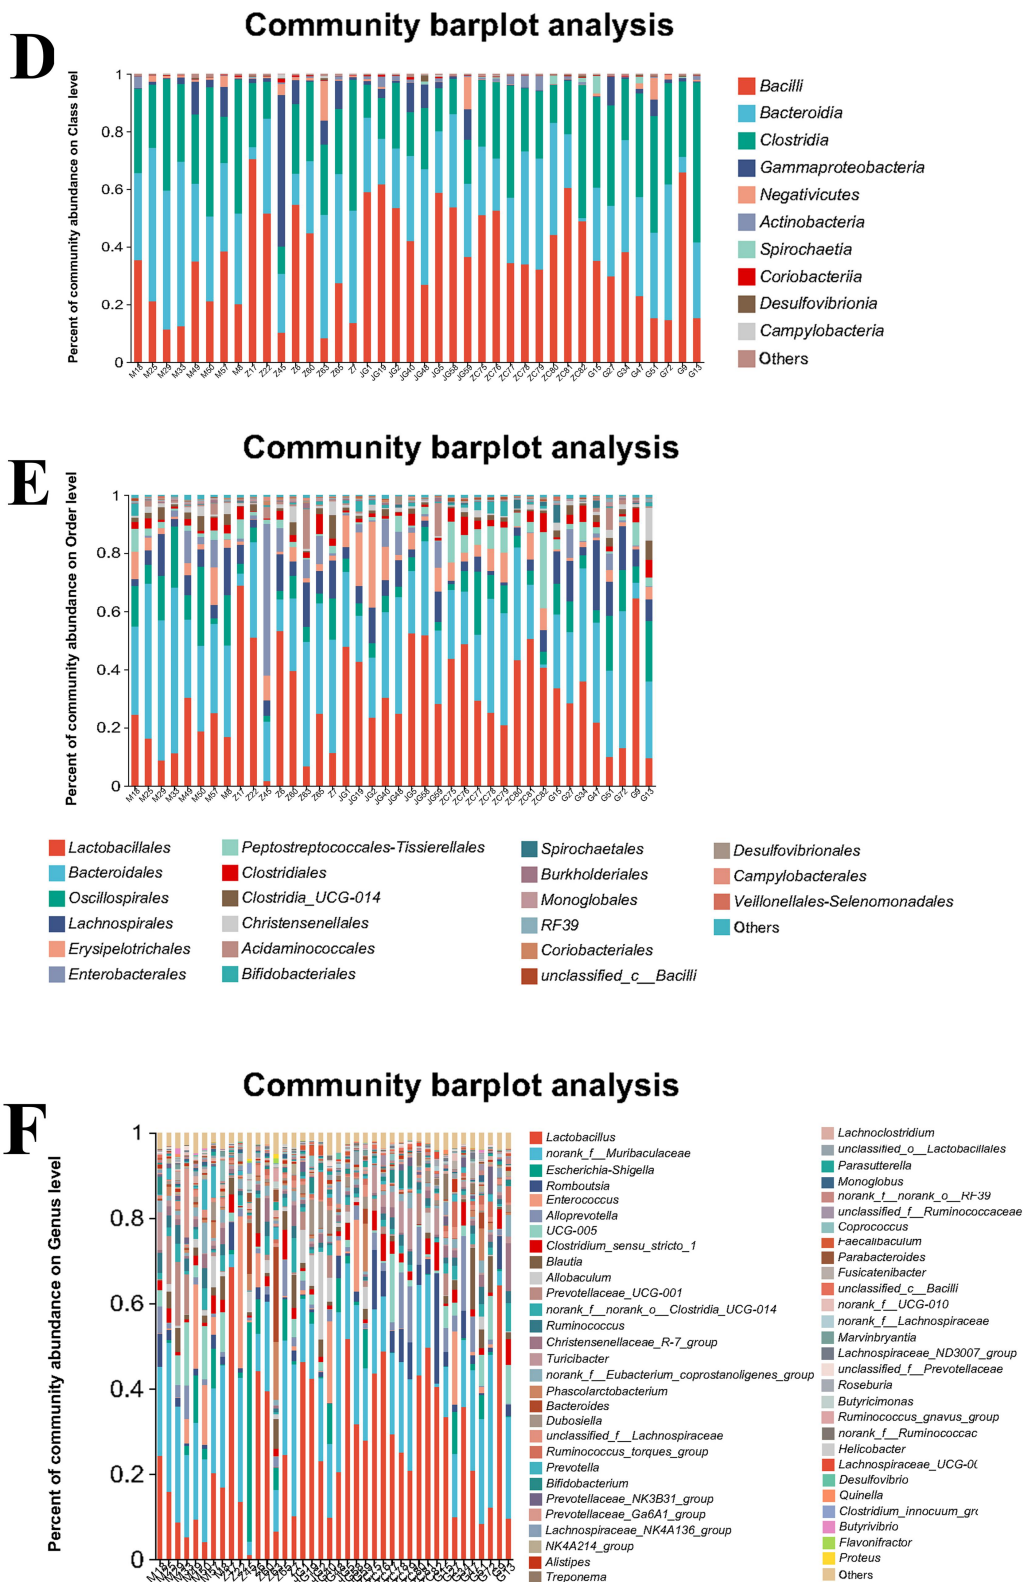

Fig. S3-1. Evaluation of the overall sample of rat intestinal microbiota. D-F: Bacteria at the level of phylum, family, class, order, and genus analysis of the overall species abundance of the population.

G

Community barplot analysis

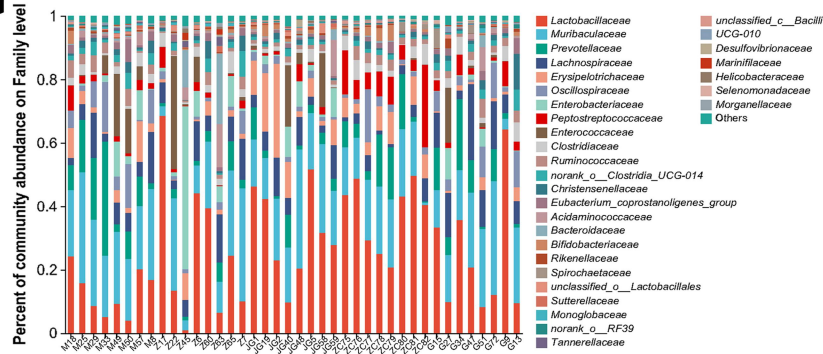

H

LEfSe Bar

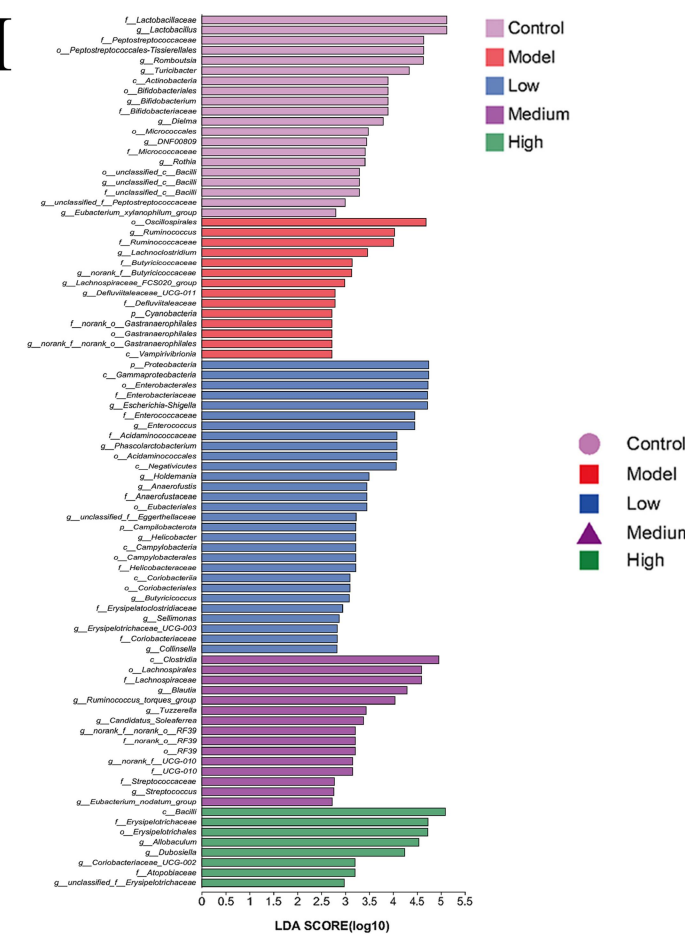

I

Cladogram

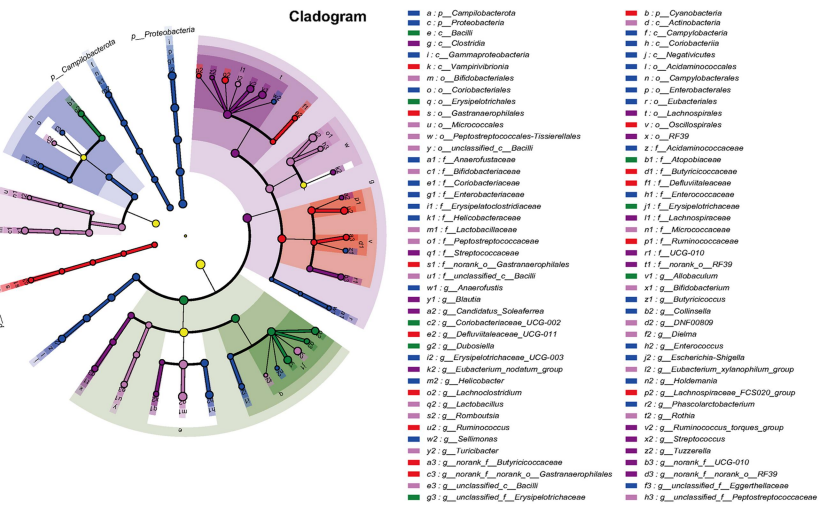

Fig. S3-2. Evaluation of the overall sample of rat intestinal microbiota. G: Intestinal bacteria at the level of phylum, family, class, order, and genus analysis of the overall species abundance of the population; H: LEfSe analysis of the effect of species abundance on the difference effect; I: Cladogram diagram to explain the significant difference dominant species.

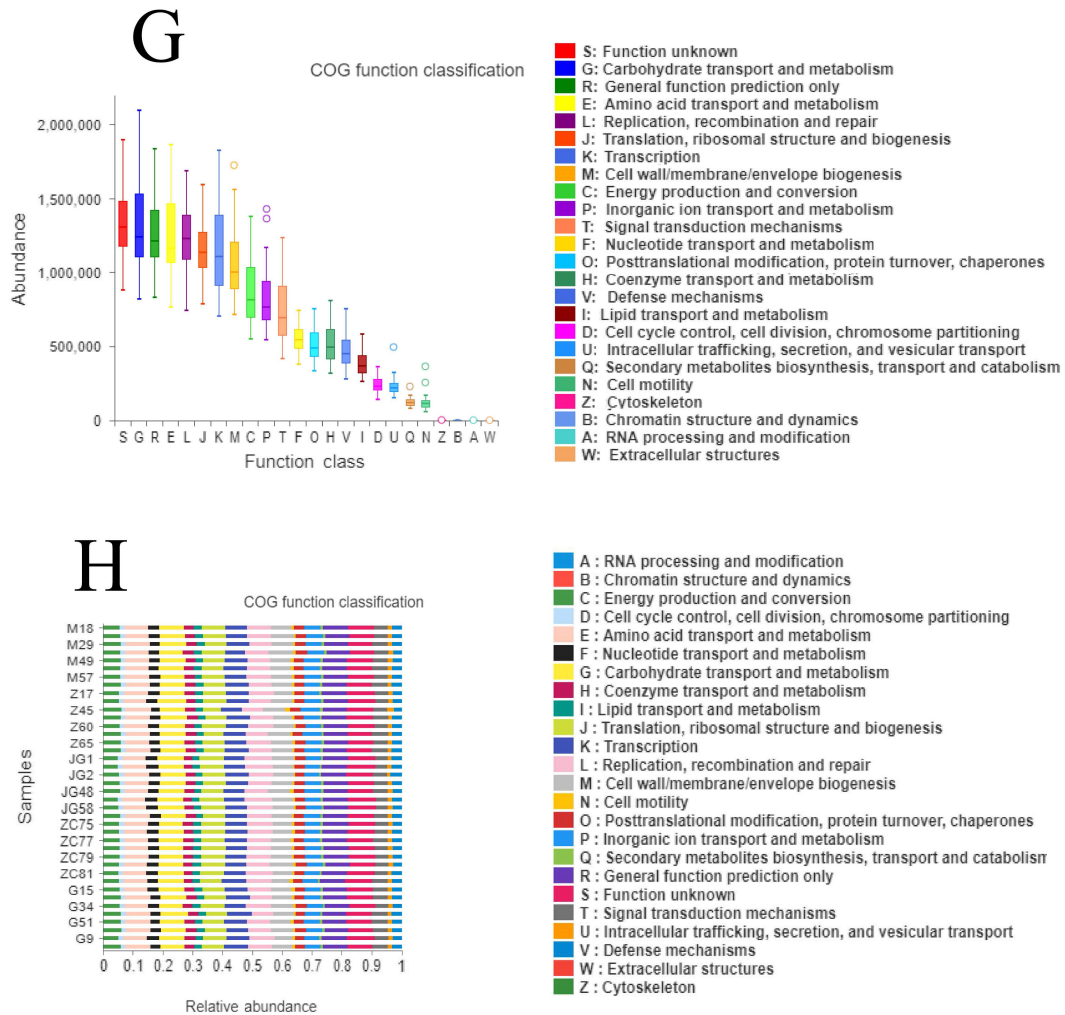

Fig. S4. Microbiota data analysis and function classification. G-H: COG function classification.

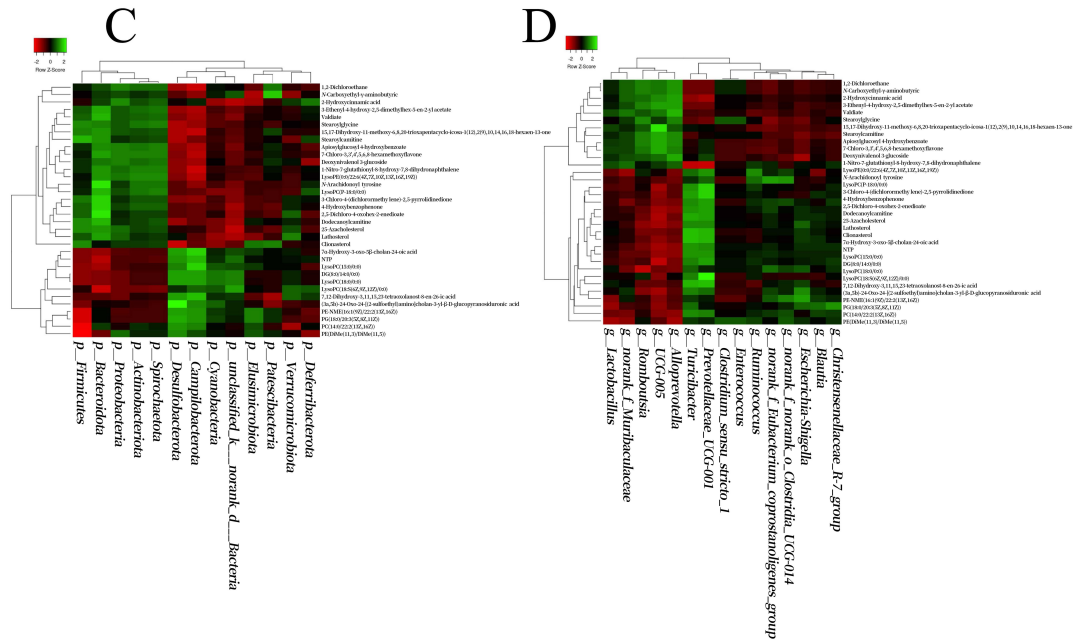

Fig. S5. Analysis of the correlation between biomarkers and intestinal microbiota. C: The difference between the phylum level and the serum biomarker analysis of the association of substances; D: Analysis of the association between different bacterial groups and serum biomarkers at the genus level.



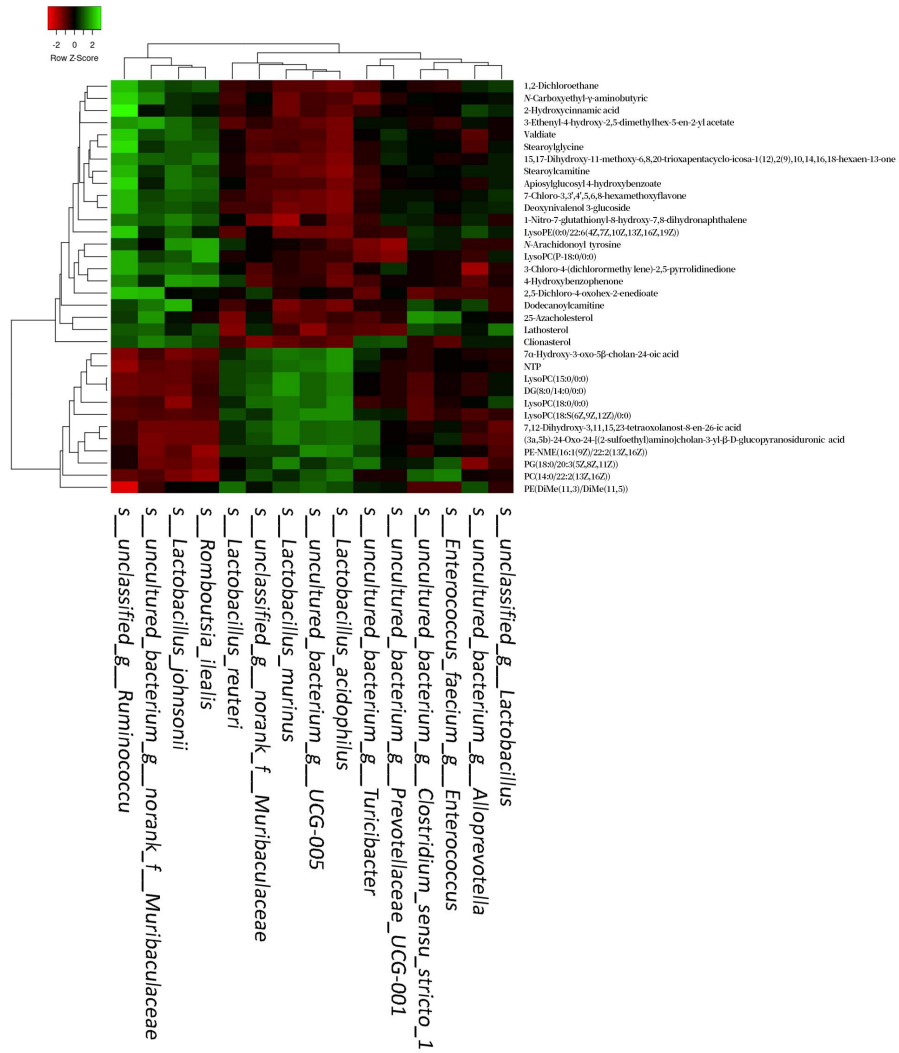

Fig. S6. Gut microbiota analysis. Species level callback
